# Supplementary material for: Preparation and characterization of cockle shell aragonite nanocomposite porous 3D scaffolds for bone repair
Source: PubMed Central journal article supplement — Biochem Biophys Rep. 2017 Apr 23;10:237–51. doi: 10.1016/j.bbrep.2017.04.008 (PMC5614679; doi:10.1016/j.bbrep.2017.04.008), 2017-04-23
Supplement: mmc1.pdf [file mmc1.pdf]

To view the full contents of this document, you need a later version of the PDF viewer. You can upgrade to the latest version of Adobe Reader from [www.adobe.com/products/acrobat/readstep2.html](http://www.adobe.com/products/acrobat/readstep2.html)

For further support, go to [www.adobe.com/support/products/acrreader.html](http://www.adobe.com/support/products/acrreader.html)
